# Supplementary material
Source: PubMed Central journal article supplement (PMC3981139)

## SUPPLEMENTARY FIGURE LEGENDS

**Figure S1. Additional characterization of *Atg5VC* colons.** (A, B) Colonic sections from control and *Atg5VC* mice fluorescently stained for (A) Muc2 or (B) UEA. Bars=200 $\mu$ m. (C) H&E stained sections of descending colons from control and *Atg5VC* mice. Bars=200 $\mu$ m. (D-G) Quantification of the average (D) crypt height, (E) number of mitotic cells per crypt, (F) number of epithelial apoptotic cells/545  $\mu$ m of mucosa, and (G) number of neutrophils/545  $\mu$ m of mucosa counted from H&E stained sections of descending colons from control and *Atg5VC* mice (n=3 mice/group). Error bars represent standard deviations. No statistically significant differences were found in all three measurements as determined by the Student's *t* test.

**Figure S2. *Atg7VC* and *LC3B*<sup>-/-</sup> goblet cell accumulate mucin.** (A and C) Alcian blue-stained sections of descending colons from controls and (A) *Atg7VC* (C) *LC3 $\beta$* <sup>-/-</sup> mice. Bars=200 $\mu$ m. (B and D) Quantification of average mucin area/goblet cell in control, *Atg7VC*, and *LC3 $\beta$* <sup>-/-</sup> mice (n=5-7 mice/group from 3 independent experiments; 100 goblet cells measured/ mouse). \*\*\*, P<0.001 as determined by the Student's *t* test.

**Figure S3. Tat-Cre treatment of *FIP200*<sup>ff</sup> and *Atg14*<sup>ff</sup> organoids.** (A) Representative images of a single colonic spheroid cultured in either 50% conditioned media (CM) or 5% CM + 5 $\mu$ M DAPT. (B-C) Genotyping results of *Atg14*<sup>ff</sup> and *FIP200*<sup>ff</sup> spheroid clones treated with recombinant Tat-cre.

**Figure S4. LC3 localizes to multi-vesicular vacuoles.** Lower power Immunogold TEM image for LC3 $\beta$  from a wild-type mouse shown in Figure 3B. LC3-positive vacuole is marked within the white dashed box. MG: mucin granule

**Figure S5. Microarray analysis of Atg5-deficient colonic epithelium reveals defects in endocytosis but not mucin production.** (A) KEGG pathway schematic generated from DAVID bioinformatics suite. Red stars indicate genes (in the green boxes) whose mRNA levels were different between control and Atg5-deficient colonic crypt base epithelial cells. Green Arrows indicate molecular interaction or relation (B) Table of genes that have differential expression in Atg5-deficient crypt base epithelial cells that are part of the KEGG endocytosis pathway. (C) A heat map of the highest ranking Gene Ontology FAT terms (determined using the DAVID bioinformatics program) under the cellular component domain for Atg5-deficient epithelial cells obtained from a microarray comparing control and *Atg5<sup>VC</sup>* colonic crypt base epithelium. The color scale corresponds to the number of genes pertaining to the GO term for *Atg5<sup>VC</sup>* mice. The significance of enrichment was calculated using a modified Fisher's exact test. (D) Expression ratio (comparing Atg5-deficient colonic epithelium to control) of the major secreted mucins in the colon.

**Figure S6. Inhibition of clathrin-mediated endocytosis results in goblet cell mucin accumulation.** (A) Images of wild-type colonic epithelial organoids labeled with TRITC-UEA (red) after treatment with vehicle, negative control, or 100 $\mu$ M Pitstop2. Bars=20 $\mu$ m. (B) Quantification of average mucin area/goblet cell (n=3 independent experiments/group; each experiment with two replicate wells; 30-90 cells were quantified/well). Error bars indicate SEM. \*\*\*\*\*,  $P < 0.0001$  as determined by ANOVA with Tukey's multiple post-test comparisons.

**Figure S7. NADPH oxidase deficiency results in goblet cell mucin accumulation.** (A) p22phox immunoblot of colonic spheroids treated with 100nm BafA1 as indicated (B) Low power immunogold TEM image for LC $\beta$  and p22phox shown in Figure 5E (C) Semi-quantitative PCR results showing p47phox expression in the spleen and colonic organoids. (C-E) Periodic

Acid-Schiff/Alcian Blue stained sections of descending colons from (D) control and *p47phox*<sup>-/-</sup> and control and mice treated with 3% NAC in the drinking water. Bars=200μm. (E)

Quantification of average mucin area/goblet cell in control and *p47phox*<sup>-/-</sup> mice (n=5-7 mice/group from 3 independent experiments; 100 goblet cells measured/ mouse). \*\*, P<0.01 as determined by the Student's *t* test.

**Figure S8. Loss of ROS results in goblet cell mucin accumulation.** Periodic Acid-

Schiff/Alcian Blue stained sections of descending colons from control mice treated with 3% NAC in the drinking water. Bars=200μm.

**Figure S9. ROS mediated intracellular calcium release is important for goblet cell function.**

(A) LC3 immunoblots of colonic spheroids treated with 300 μM hydrogen peroxide or 100nm BafA1 as indicated. Representative image is shown from n=3 experiments. (B) Quantification of intracellular calcium using Fluo-4 in wild-type colonic spheroids treated with BAPTA-AM, Atg5VC and p22 mut spheroids treated with or without ionomycin. All measurements are relative to untreated controls (n=3 experiments). Error bars indicate SEM. (C-D) LC3 immunoblots of colonic spheroids treated with 100 μM BAPTA, 100 nM ionomycin, or 100 nM BafA1 as indicated.

Figure S1

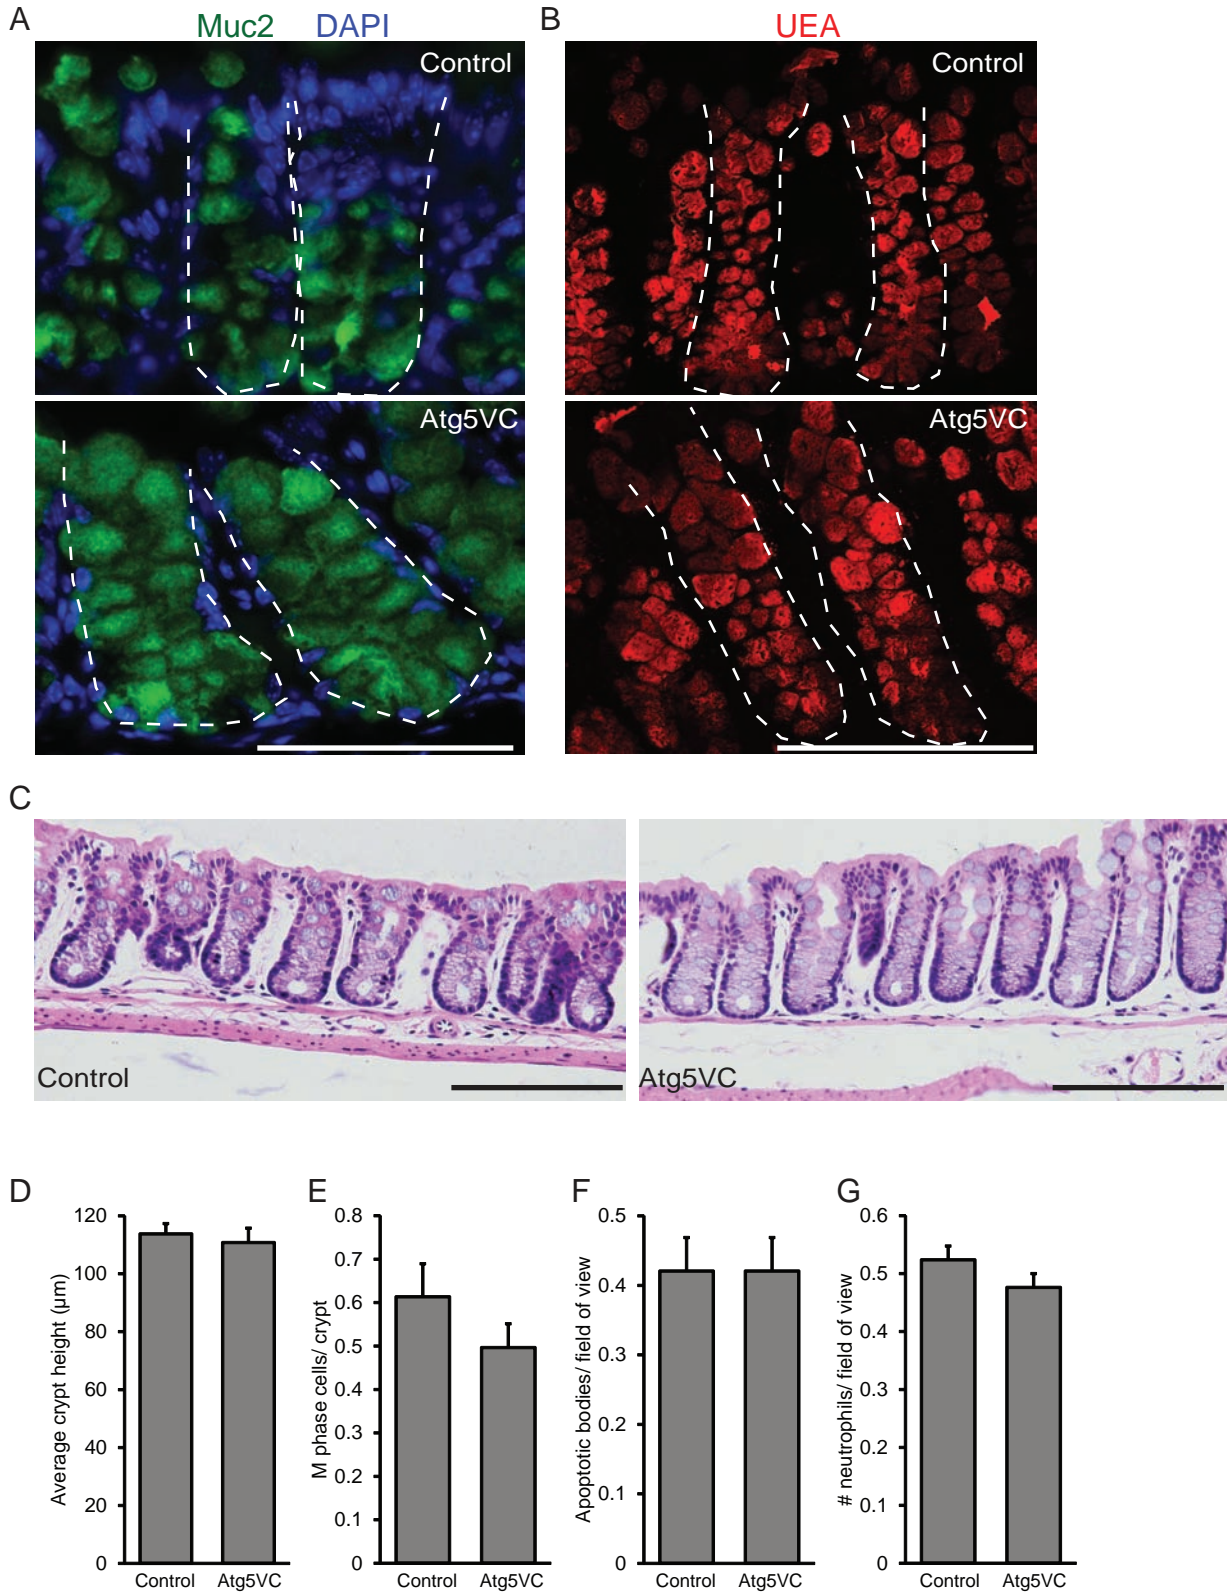

Figure S2

A

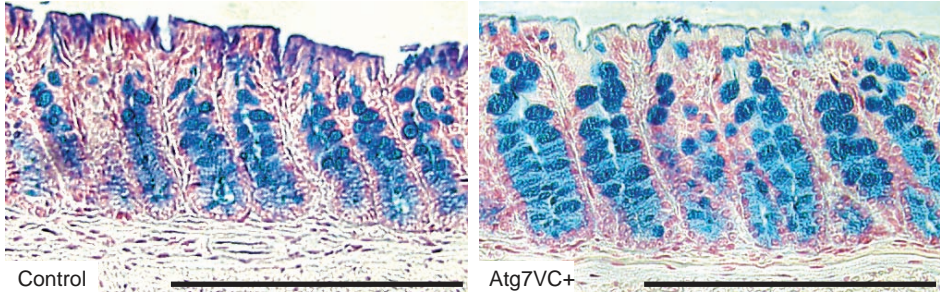

B

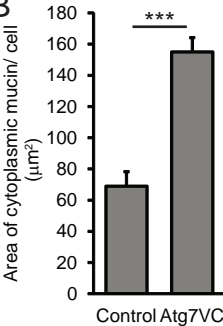

C

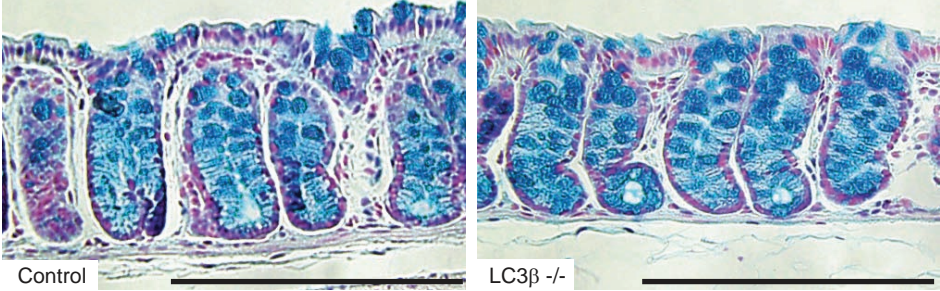

D

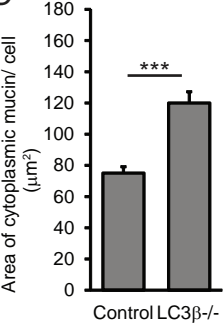

Figure S3

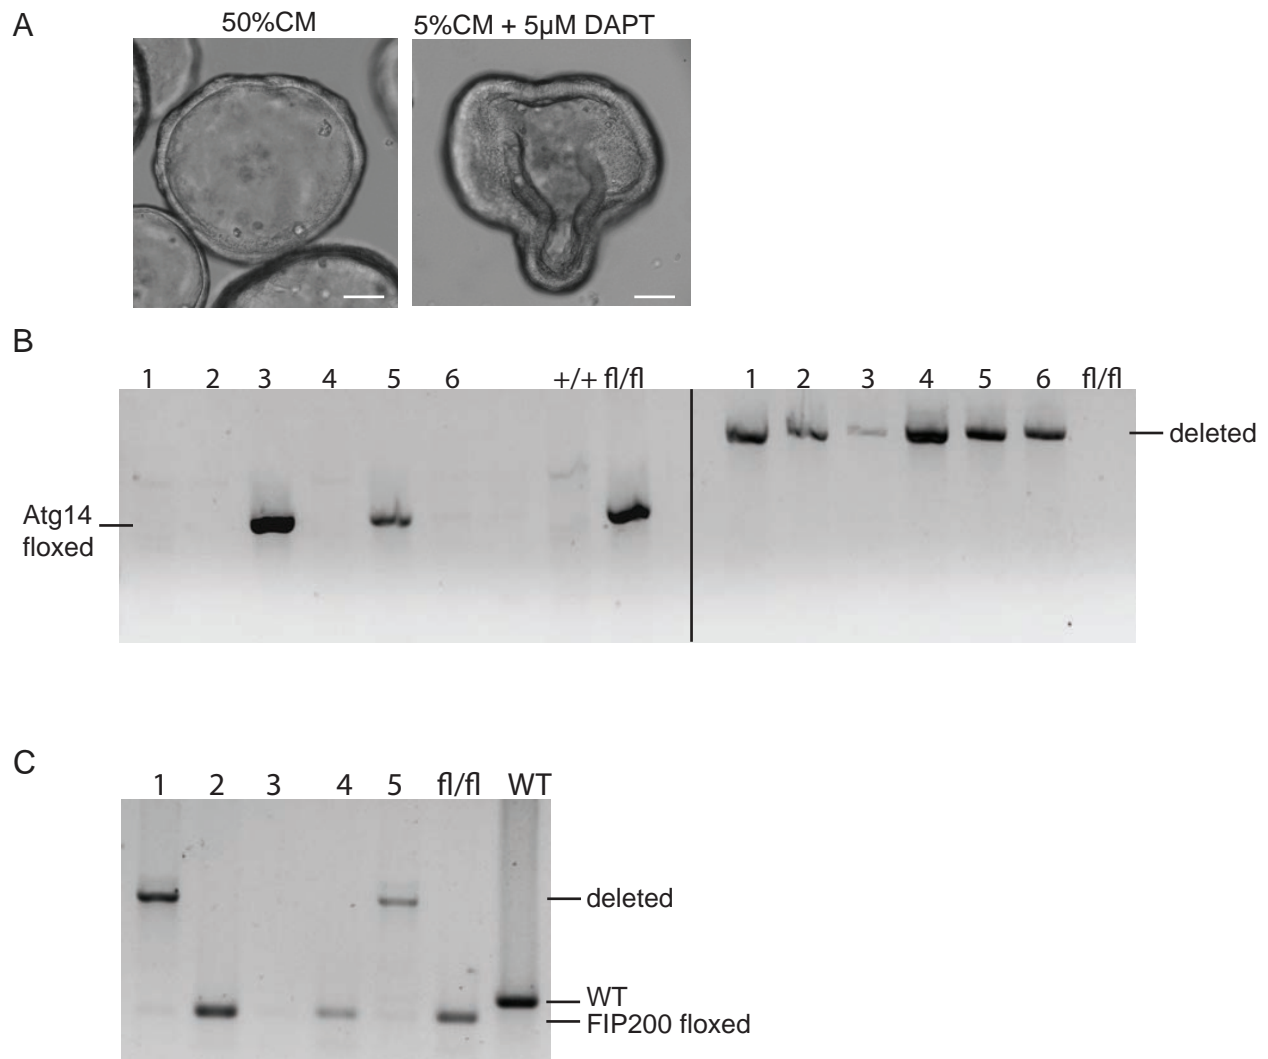

Figure S4

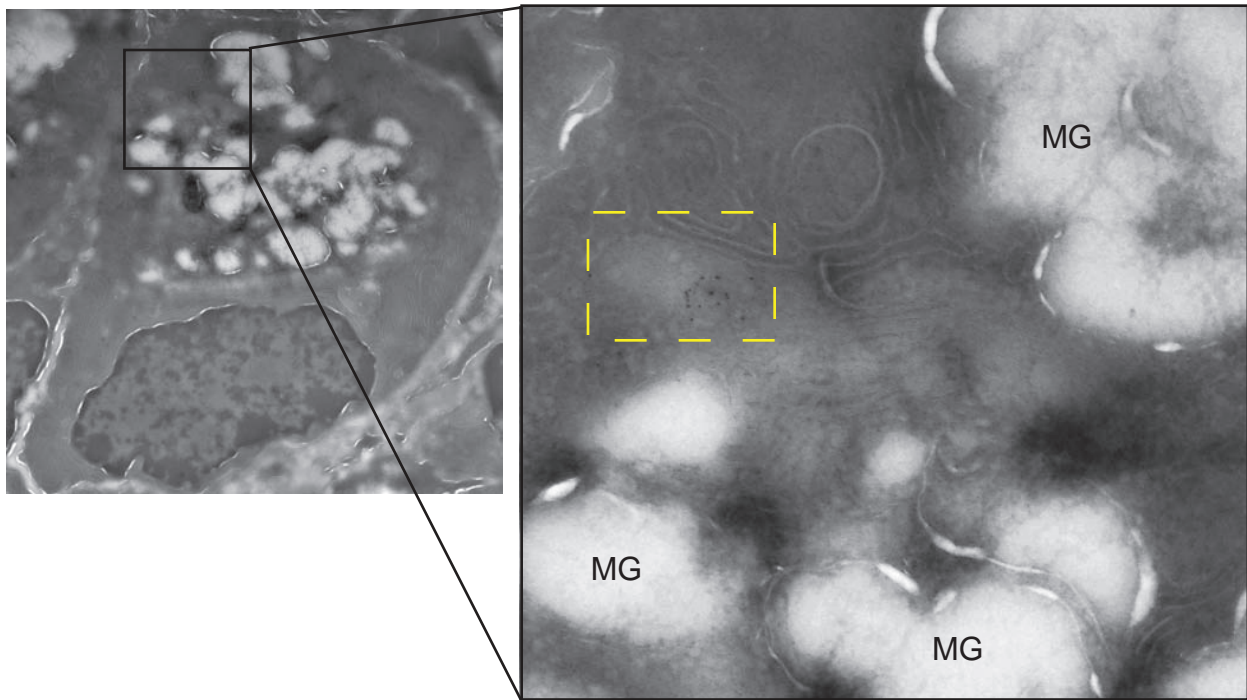

Figure S5

A

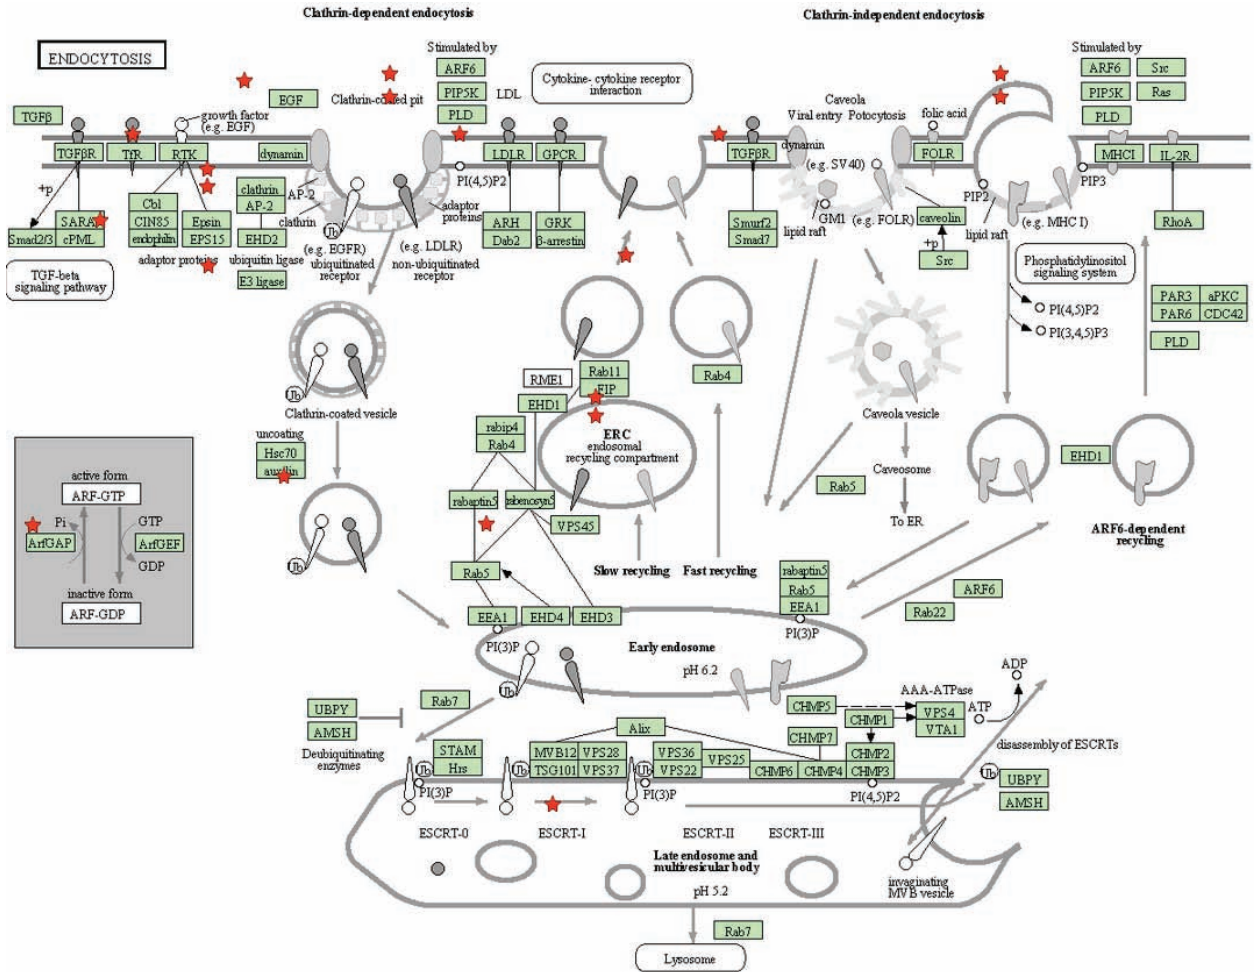

B

| Gene      | Fold change |
|-----------|-------------|
| RAB11B    | 2.050263    |
| RET       | 1.695945    |
| VPS28     | 1.683376    |
| RAB11FIP1 | 1.666225    |
| H2-K1     | 1.647814    |
| KIT       | 1.647683    |
| PIP4K2B   | 1.628006    |
| PLD1      | 1.599904    |
| CLTC      | 1.519121    |
| IGF1R     | 1.515073    |
| AP2A2     | -1.504144   |
| KDR       | -1.549085   |
| PIP5K1B   | -1.549547   |
| EGF       | -1.644696   |
| ZFYVE20   | -1.679264   |
| LDLR      | -1.748821   |
| SH3GLB1   | -1.824857   |

C

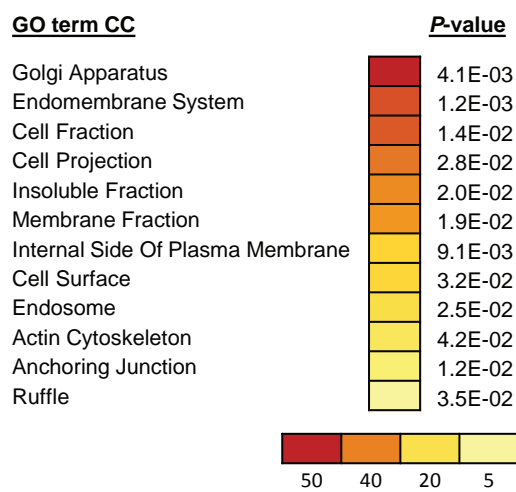

D

| Secreted Mucin | Expression Ratio (Atg5VC: control) |
|----------------|------------------------------------|
| Muc2           | 0.85                               |
| Muc5AC         | 0.96                               |
| Muc6           | 1.02                               |



Figure S6

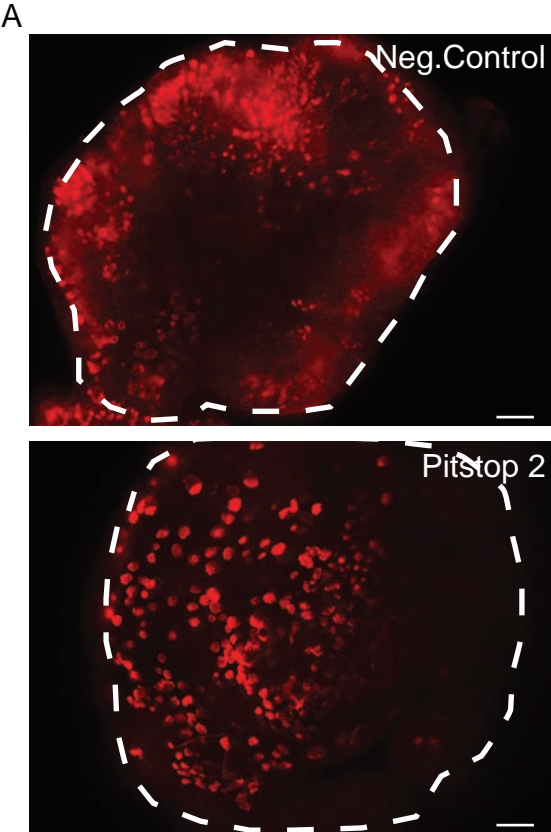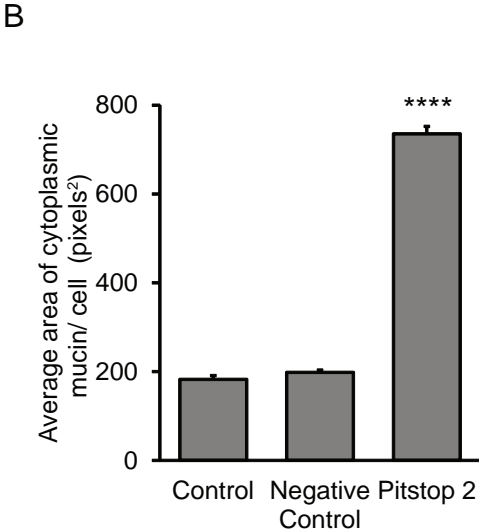

Figure S7

A

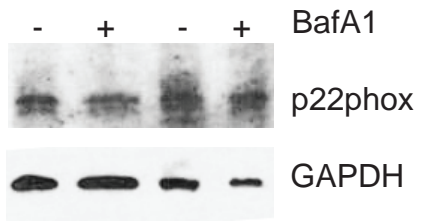

B

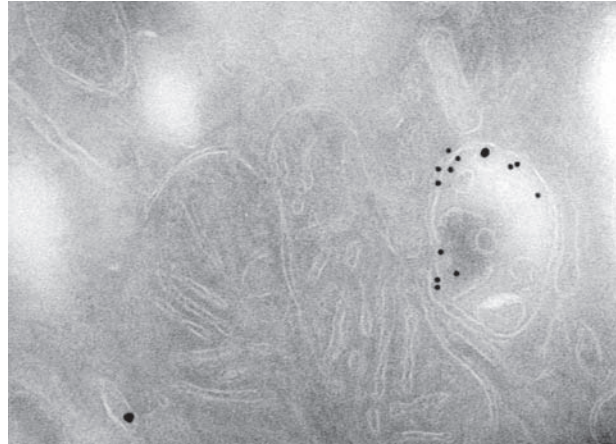

C

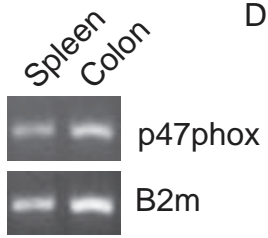

D

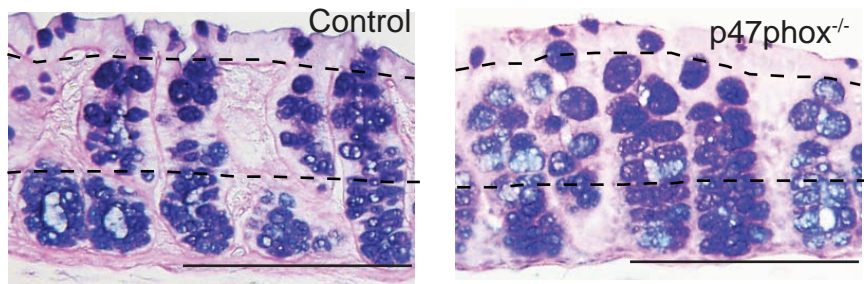

E

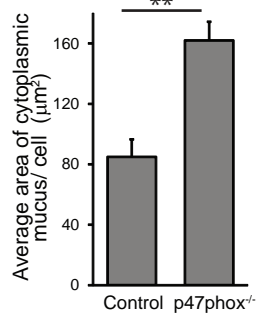

Figure S8

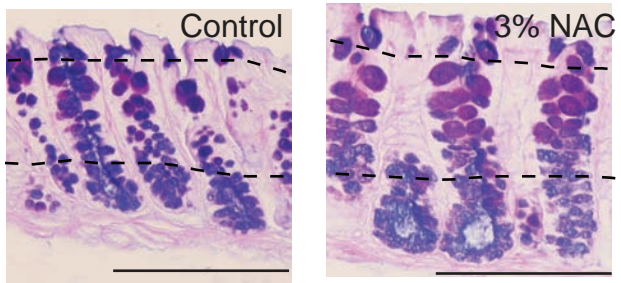

Figure S9

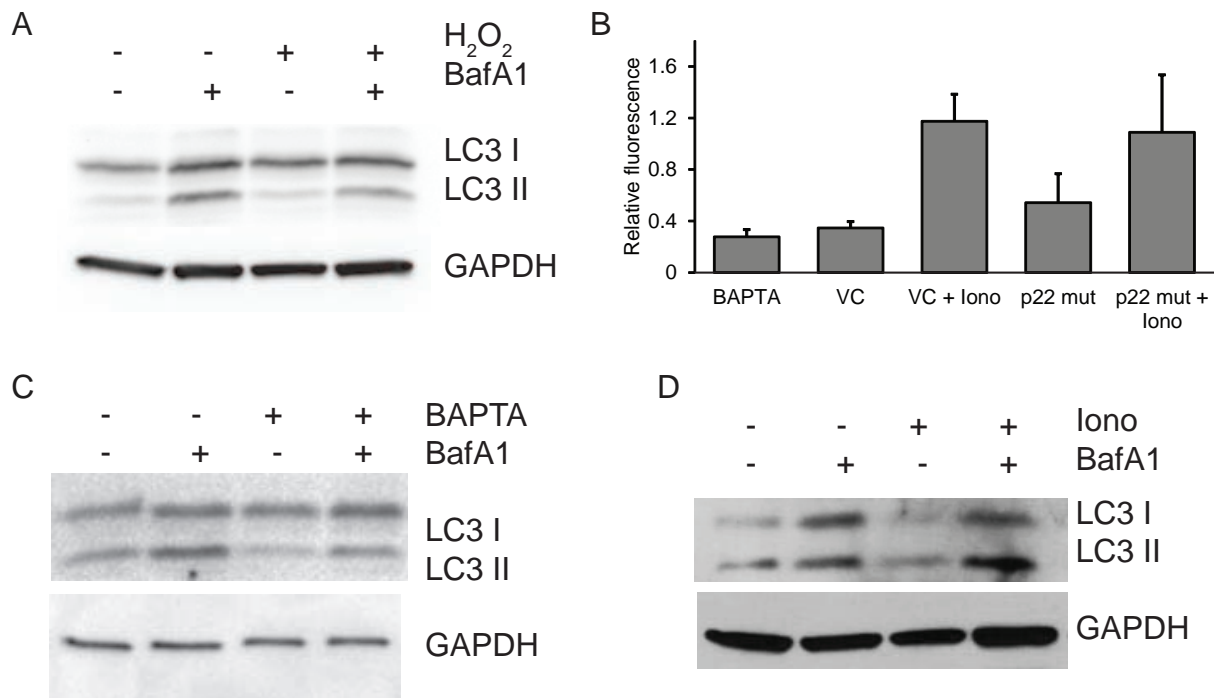

Supplement: emboj2013233s1.pdf [file emboj2013233s1.pdf]
